RESEARCH ARTICLE

# Nicotinic alpha 7 receptor agonists EVP-6124 and BMS-933043, attenuate scopolamine-induced deficits in visuo-spatial paired associates learning

Michael R. Weed<sup>1\*</sup>, Joseph Polino<sup>1</sup>, Laura Signor<sup>1</sup>, Mark Bookbinder<sup>1</sup>, Deborah Keavy<sup>1</sup>, Yulia Benitex<sup>2</sup>, Daniel G. Morgan<sup>2</sup>, Dalton King<sup>3</sup>, John E. Macor<sup>3</sup>, Robert Zaczek<sup>1</sup>, Richard Olson<sup>3</sup>, Linda J. Bristow<sup>1</sup>

**1** Genetically Defined Diseases and Genomics, Bristol-Myers Squibb Company, Wallingford, CT, United States of America, **2** Pharmaceutical Candidate Optimization, Bristol-Myers Squibb Company, Wallingford, CT, United States of America, **3** Discovery Chemistry, Bristol-Myers Squibb Company, Wallingford, CT, United States of America

✉ Current address: CNS Disease and Physiology, RxGen, Inc., New Haven, CT, United States of America  
\* [mweed@rx-gen.com](mailto:mweed@rx-gen.com)

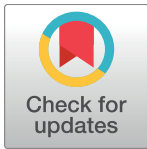

**OPEN ACCESS**

**Citation:** Weed MR, Polino J, Signor L, Bookbinder M, Keavy D, Benitex Y, et al. (2017) Nicotinic alpha 7 receptor agonists EVP-6124 and BMS-933043, attenuate scopolamine-induced deficits in visuo-spatial paired associates learning. PLoS ONE 12 (12): e0187609. <https://doi.org/10.1371/journal.pone.0187609>

**Editor:** Michael Taffe, Scripps Research Institute, UNITED STATES

**Received:** May 4, 2017

**Accepted:** October 23, 2017

**Published:** December 19, 2017

**Copyright:** © 2017 Weed et al. This is an open access article distributed under the terms of the [Creative Commons Attribution License](https://creativecommons.org/licenses/by/4.0/), which permits unrestricted use, distribution, and reproduction in any medium, provided the original author and source are credited.

**Data Availability Statement:** All relevant data are within the paper and its Supporting Information file.

**Funding:** This work was funded in full by BMS, and all authors were BMS employees during their contribution to this project. Some authors own stock in BMS. BMS only provided financial support in the form of authors' salaries and/or research materials. No other individuals employed or contracted by BMS (other than the named authors)

## Abstract

Agonists at the nicotinic acetylcholine alpha 7 receptor (nAChR  $\alpha 7$ ) subtype have the potential to treat cognitive deficits in patients with Alzheimer's disease (AD) or schizophrenia. Visuo-spatial paired associates learning (vsPAL) is a task that has been shown to reliably predict conversion from mild cognitive impairment to AD in humans and can also be performed by nonhuman primates. Reversal of scopolamine-induced impairment of vsPAL performance may represent a translational approach for the development of nAChR  $\alpha 7$  agonists. The present study investigated the effect of treatment with the acetylcholinesterase inhibitor, donepezil, or three nAChR  $\alpha 7$  agonists, BMS-933043, EVP-6124 and RG3487, on vsPAL performance in scopolamine-treated cynomolgus monkeys. Scopolamine administration impaired vsPAL performance accuracy in a dose- and difficulty- dependent manner. The impairment of eventual accuracy, a measure of visuo-spatial learning during the task, was significantly ameliorated by treatment with donepezil (0.3 mg/kg, i.m.), EVP-6124 (0.01 mg/kg, i.m.) or BMS-933043 (0.03, 0.1 and 0.3 mg/kg, i.m.). Both nAChR  $\alpha 7$  agonists showed inverted-U shaped dose-effect relationships with EVP-6124 effective at a single dose only whereas BMS-933043 was effective across at least a 10 fold dose/exposure range. RG3487 was not efficacious in this paradigm at the dose range examined (0.03–1 mg/kg, i.m.). These results are the first demonstration that the nAChR  $\alpha 7$  agonists, EVP-6124 and BMS-933043, can ameliorate scopolamine-induced cognitive deficits in nonhuman primates performing the vsPAL task.

played any role in: study design, data collection and analysis, or preparation of the manuscript. The specific roles of the authors are articulated in the 'author contributions' section. Nonauthors at BMS were involved in the decision to publish, for instance, in vetting the manuscript material for disclosure of proprietary information and approval of the timing of submission.

**Competing interests:** All authors were employees of Bristol-Myers Squibb during these studies, and some authors own stock in BMS. The authors have declared that no competing interests exist. This does not alter the authors' adherence to PLOS ONE policies on sharing data and materials.

## Introduction

Compounds which activate nicotinic acetylcholine receptors of the  $\alpha$ 7 receptor subtype (nAChR  $\alpha$ 7) have received considerable attention because of their potential to treat cognitive symptoms in patients with schizophrenia or Alzheimer's disease (AD) [1, 2]. In preclinical species, many nAChR  $\alpha$ 7 agonists have been shown to reliably improve cognition in a variety of different models assessing different cognitive domains. Thus in normal subjects, nAChR  $\alpha$ 7 agonists have been shown to improve attention [3, 4] and the retention of episodic memory in rodents [5–8] and to improve working memory in nonhuman primates [9–12]. In addition these agents have been shown to reverse N-methyl-D-aspartate (NMDA) receptor antagonist-induced deficits in attentional set shifting [13–15] and object recognition memory in rodents [6, 16], and to alleviate working memory deficits in nonhuman primates [17]. In humans NMDA receptor antagonists such as ketamine and phencyclidine (PCP) produce symptoms that resemble those seen in schizophrenia patients including psychotomimetic effects, negative symptoms and cognitive impairment [18, 19] NMDA antagonists are therefore commonly used as a pharmacological approach to model schizophrenia-like symptoms in animals.

With respect to AD, many studies have examined the ability of nAChR  $\alpha$ 7 agonist treatment to reverse cognitive impairment induced by administration of the nonselective muscarinic AChR antagonist scopolamine. This agent has been used extensively in rodents to model the cholinergic deficits associated with aging and AD [20, 21]. Treatment with nAChR  $\alpha$ 7 agonists has been shown to reverse scopolamine-induced deficits in object recognition memory retention [7, 22], spatial working memory [23, 24]; and avoidance learning and memory in rodents [7, 25]. Additional studies in aged animals have also shown improvements in spatial learning and working memory in the Morris water maze task [15, 25]. Finally, nAChR  $\alpha$ 7 agonist treatment of aged 3X Tg AD mice, at a time when subjects showed marked AD related pathology (i.e.  $\beta$  amyloid plaques, neuro-inflammation and neurofibrillary tangles), significantly improved spatial learning and memory in the Morris water maze task, object recognition memory and contextual fear memory demonstrating efficacy in a disease relevant model for this mechanism [26].

The development of novel agents for the treatment of cognitive impairment is greatly facilitated by the use of translational tests that can be applied across species to examine different cognitive domains. In this regard, the Cambridge Neuropsychological Testing Automated Battery (CANTAB) provides a translational platform that can be used to examine attention, executive function and visual learning and memory in both humans and nonhuman primates [27–30]. In humans, CANTAB has been extensively validated in different patient populations including AD and schizophrenia patients who exhibit poor performance on multiple tests when compared to age matched, healthy subjects [31–34]. Of note, impaired performance of the visuo-spatial Paired Associates Learning (vsPAL) test, which requires subjects to learn an association between an abstract shape and its spatial location on a computer monitor, is observed in patients with mild cognitive impairment (MCI) and worsens in AD; indeed impaired vsPAL performance may predict progression from MCI to AD [32–35]. Functional imaging studies also show abnormal hippocampal activation patterns in MCI patients performing the vsPAL task consistent with the hypothesis that hippocampal dysfunction drives the cognitive deficits seen in the early stages of AD [36]. Furthermore recent studies show that treatment-naive AD patients, receiving a single 5 mg dose of the acetylcholinesterase inhibitor donepezil, have improved performance of the CANTAB vsPAL task [37]. Thus CANTAB vsPAL task performance can reliably detect cognitive impairment in MCI and AD patients and is sensitive to the administration of cholinergic therapeutic agents.

In nonhuman primates performance of the CANTAB vsPAL task is impaired by acute scopolamine treatment, a pharmacological approach used to model AD-like cholinergic deficits [38, 39]. In humans, scopolamine treatment also impairs vsPAL performance in most [40, 41] but not all studies reported [42]. In addition, recent studies in humans demonstrate that scopolamine-impaired performance of the CogState vsPAL task can be ameliorated by donepezil treatment [40]. These results suggest that this approach may have translational utility for the development of novel AD therapeutics. Given the potential of nAChR  $\alpha$ 7 agonists in this regard, the present study was conducted to examine these agents in the nonhuman primate scopolamine vsPAL model. Specifically, we examined the effect of acute treatment with BMS-933043 [13, 43], EVP-6124 [22] or RG3487 [15], in comparison to donepezil, in scopolamine-treated cynomolgus monkeys trained to perform the CANTAB vsPAL task. At the time these studies were initiated, EVP-6124 and RG3487 were the most advanced clinical nAChR  $\alpha$ 7 agonists and were therefore ideal comparators for characterization of BMS-933043 in a translational model.

## Materials and methods

### Subjects

Thirteen experimentally naïve male cynomolgus monkeys (*Macaca Fascicularis*; 3–5 years of age; 5.0–7.5 kg at the beginning of the study) served as subjects. Subjects were housed in pairs, separated during testing (Monday through Friday) and re-paired after feeding in the afternoon. Subjects were fed standard monkey chow (Harlan Teklad Global 20% protein Primate Diet 2050) in sufficient quantities to ensure normal growth while maintaining sufficient motivation to perform the cognitive testing [30]. Water was continuously available except during behavioral testing. Fresh fruit, toys and foraging devices were routinely provided in the monkey colony rooms. Laboratory animal care was according to Public Health Service Policy on the Humane Care and Use of Laboratory Animals and the Guide for the Care and use of Laboratory Animals, [44]. The protocol and experiments were approved by the Wallingford Animal Care and Use Committee of the Bristol-Myers Squibb Company.

### Apparatus

For behavioral testing subjects were seated comfortably in restraint chairs (Primate Products, Immokalee, FL), and placed in individual, sound attenuated chambers (Med-Associates, St. Albans, VT), equipped with lights, a white noise generator and a monitoring camera. A touch-sensitive computer monitor was within easy reach and session events were controlled by a Monkey CANTAB test station; (Lafayette Instruments, Lafayette, IN) and Whisker Control [45]. Following correct responses, a dispenser delivered 190 mg banana-flavored pellets (Bioserv, Frenchtown PA).

### Behavioral procedure

Ten subjects were trained to perform the CANTAB vsPAL test as previously described [38, 46]. Briefly, the test required the animal to associate a stimulus (abstract shape) with a given spatial location on the computer screen (one of the four corners; S1 Fig). Ten trials each of increasing difficulty (2-, 3- or 4- stimuli) were presented. Trials began with the ‘sample phase’ where stimuli are presented and touched sequentially in their respective locations with a 1 sec delay between stimuli. Following 5 sec where the screen was blank, the choice phase began. The same stimulus was presented in all four corners of the screen for all difficulty levels. Touching the stimulus in the sample location, within 30 sec, resulted in delivery of a food

pellet. After a 1 sec screen blank another stimulus was presented in all four corners. If the animal touched the correct location for all shapes in the choice phase on the first attempt the trial was recorded as 'correct on the initial attempt'. Touching a stimulus in an incorrect location (or failing to touch in 30 sec) resulted in a 10 sec screen blank (time-out) and the same trial was repeated from the beginning. The same trial could be repeated up to 5 additional times.

If the animal learned the sequence by the 6th attempt, the trial was recorded as 'eventual correct', or 'incorrect' if not. Failure to respond within 30 s of each stimulus presentation was considered an 'omission.' Omissions counted in the number of attempts per trial, but did not count as 'errors' and did not affect the percent correct responding for a given difficulty level. If an animal failed to respond in a given condition, data for that condition was omitted for that animal and interpolated with the group mean for statistical analysis. Additional measures were the percent completion (the proportion of trials on which both sample and choice responses were made), and response latency (time from sample onset to the screen touch in the choice phase, averaged across difficulty conditions).

## Drugs

Donepezil hydrochloride (HCl) was purchased from Sigma-Aldrich. Scopolamine HCl, EVP-6124 HCl (Encenicline; (R)-7-chloro-N-(quinuclidin-3-yl)benzo[b]thiophene-2-carboxamide HCl)[22], RG3487 HCl (also known as R3487, MT-666 and MEM 3454; N-[(3S)-1-Azabicyclo[2.2.2]oct-3-yl]-1H-indazole-3-carboxamide HCl)[47] and BMS-933043 ((2R)-N-(6-(1H-imidazol-1-yl)-4-pyrimidinyl)-4'H-spiro[4-azabicyclo[2.2.2]octane-2,5'-[1,3]oxazol]-2'-amine) [13, 43] were synthesized at Bristol Myers Squibb. The chemical structures of these compounds are shown in Fig 1. Doses cited refer to the free base form of the compounds. Vehicles were sterile normal saline for scopolamine, donepezil, R3487 and EVP-6124, with sterile normal saline at pH 4.0 for BMS-933043. All drugs were administered intramuscularly (i.m.) in a dosing volume of 0.1–0.2 ml/kg. The dose range examined for each compound was as follows: Donepezil (0.03–0.3 mg/kg), BMS-933043 (0.03–1.0 mg/kg), EVP-6124 (0.003–1.0 mg/kg) and R3487 (0.03–1.0 mg/kg).

## Drug testing

Drug testing was initiated once animals had achieved asymptotic and stable baseline performance on the 4 stimuli condition using the eventual correct measure. Drug testing was conducted on Mondays and Thursdays. An additional baseline session was conducted on Tuesdays. The first six subjects to reach stable performance were included in the scopolamine dose-response study. Additional animals were included in later studies as their performance improved.

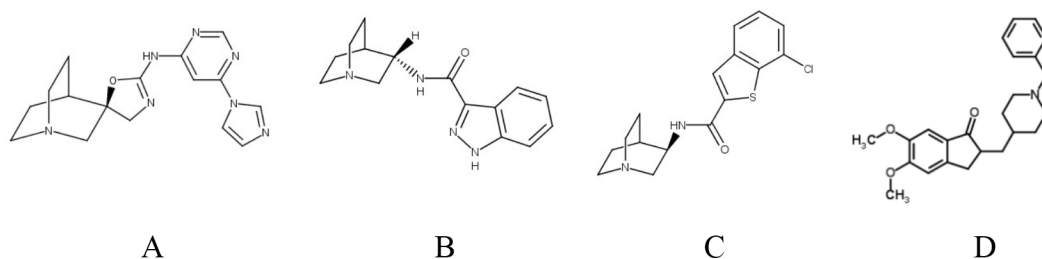

**Fig 1.** Chemical structures of A) BMS-933043, B) RG3487, C) EVP-6124 and D) donepezil.

<https://doi.org/10.1371/journal.pone.0187609.g001>

In the scopolamine dose-response study all subjects received a single i.m. injection of scopolamine or saline 15 min prior to the session. For the initial scopolamine-challenge study with donepezil, a dose of 0.0056 mg/kg scopolamine was chosen for all animals, and animals were habituated to receive two injections of saline (0.1 ml/kg i.m.) at 15 and 30 min prior to the session. Some animals demonstrated larger impairments than others to the 0.0056 mg/kg dose; therefore, in subsequent studies the dose of scopolamine was individually titrated for each subject to achieve at least a 10% reduction in eventual accuracy in the 4-stimulus condition on two sessions with a range of 15% between those sessions. Scopolamine dose was re-titrated prior to each study and scopolamine was administered no more than three times in any two-week period during testing. There was a washout period of at least 2 weeks between studies. This schedule of scopolamine administration was well tolerated. Over the two-year period of this evaluation the mean dose of scopolamine increased from 0.0056 mg/kg (range = 0.0045–0.0067 mg/kg) to 0.009 mg/kg (range = 0.0045–0.012 mg/kg). The chronological order of drug testing and mean scopolamine dose for each study was as follows: donepezil (0.0056 mg/kg scopolamine), BMS-933043 (0.0051 mg/kg scopolamine), RG3487 (0.0087 mg/kg scopolamine), EVP-6124 study 1 (0.009 mg/kg scopolamine) and EVP-6124 study 2 (0.009 mg/kg scopolamine).

Performance after vehicle+vehicle or vehicle+scopolamine treatment was determined before, during and after the dose response function for each compound and their respective means used in the data analysis (mean of at least 3 determinations). On days when compound testing occurred, approximately half the cohort received one dose and the remainder another dose of the same compound and therefore dose order was staggered between animals. With the exception of EVP-6124, all other compounds were tested in a single dose response study. EVP-6124 was tested in two independent studies because the first study with 0.03, 0.1, 0.3 and 1.0 mg/kg failed to cover the lower end of clinically relevant exposures. Therefore, a second EVP-6124 study with 0.003 and 0.01 mg/kg was conducted. Scopolamine dose titration, vehicle+vehicle and vehicle+scopolamine were determined separately for each study.

## Statistical analyses

Accuracy measures (i.e. percent initially correct and percent eventually correct) were analyzed with repeated measures analysis of variance (RM-ANOVA) with the two within-subject factors of difficulty (mean of number of stimuli per trial and overall mean) and treatment. Latencies to respond in all choice phases and percent task completed for the entire session were analyzed by one way RM ANOVA. Post-hoc analysis was conducted using Holm-Sidak's method to compare all treatment conditions with vehicle+scopolamine responses (drug studies) or scopolamine doses with vehicle treatment (scopolamine dose response study). Statistical tests were performed using OriginPro v 9.1 (OriginLab Co., Northampton, MA). Missing data were filled with the mean of the respective cell to enable RM ANOVA computation. Means following each difficulty level and the overall session mean are presented for scopolamine (Fig 2). For simplicity of presentation, overall session means are not presented in figures for test compounds (Figs 3–5) but are included in the supplemental data (S1 File) along with all applicable data for this manuscript. Performance following scopolamine 0.017 mg/kg treatment at the 4-stimuli condition resulted in excessive missing data (i.e. only 3/8 monkeys responded) and post-hoc tests were not conducted on that condition.

Effect size was calculated for the treatments which statistically differed from scopolamine using an online tool from Becker, 2000 (<http://www.uccs.edu/~lbecker/>). Cohen's *d* values of >0.2, >0.5 and >0.8 are described using the conventions of small, medium, and large effects, respectively [48].

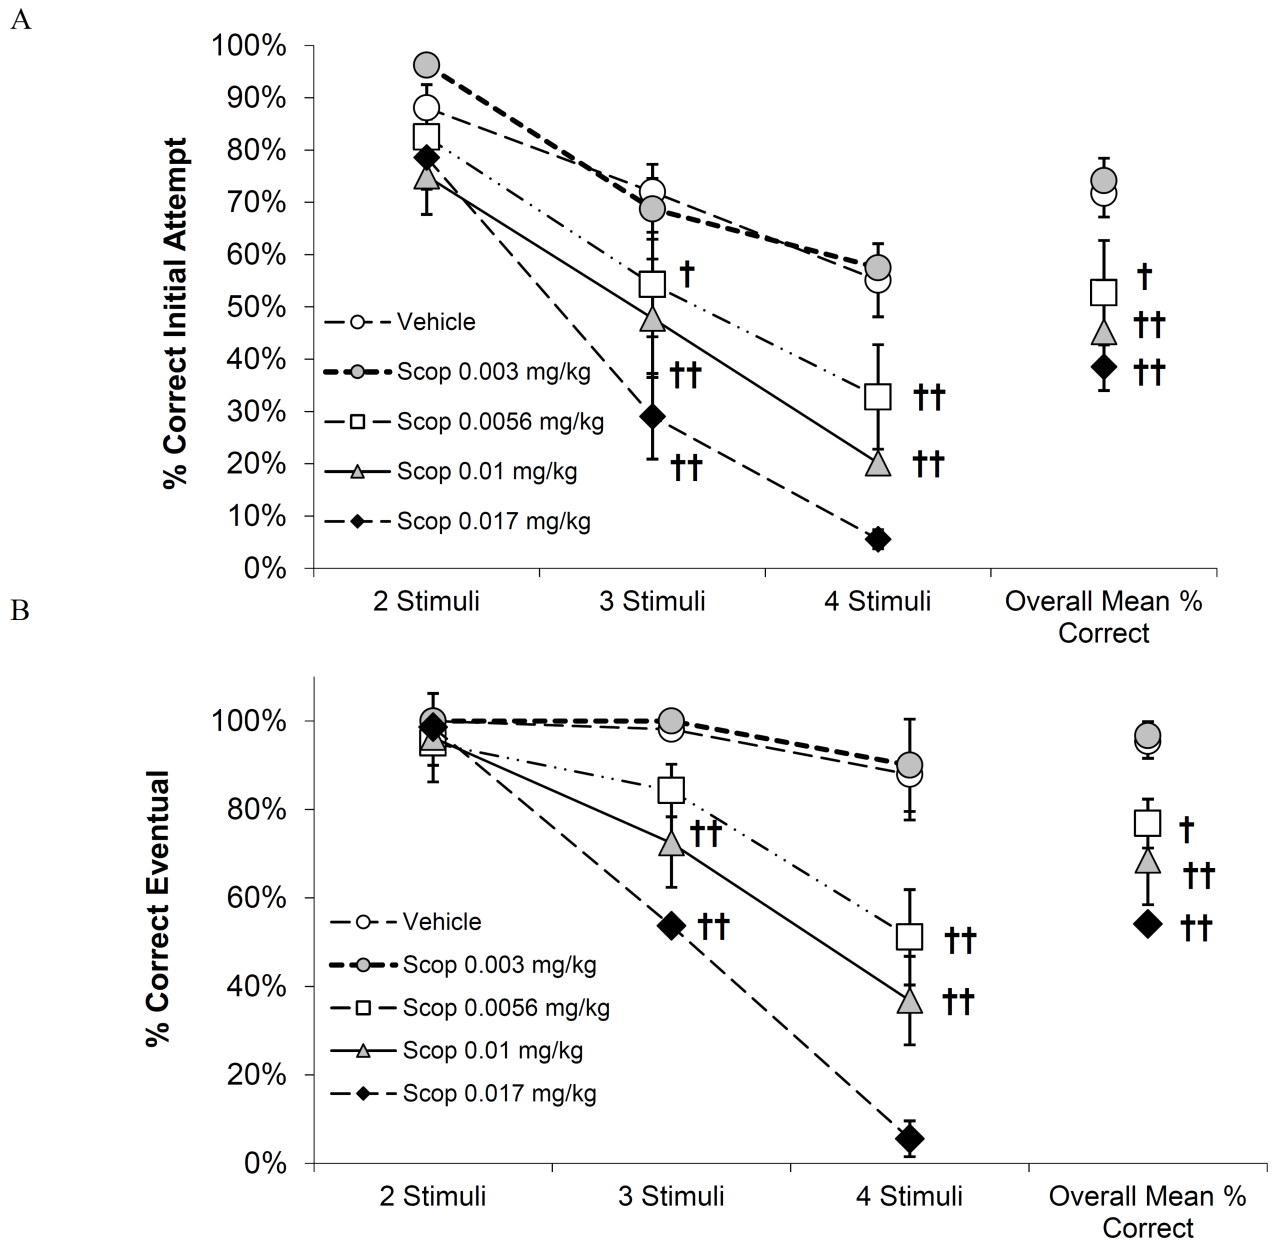

**Fig 2. Effect of scopolamine treatment on A) % correct responses at the initial attempt and B) % eventual correct responses achieved within 6 attempts.** Results are presented as the mean  $\pm$  SEM (N = 8) % initial or eventual correct responses for trials with 2-, 3- or 4- stimuli and were analyzed by 2 way RM-ANOVA followed by Holm-Sidak's post hoc analysis; †  $p < 0.05$  and ††  $p < 0.01$  compared to vehicle treatment. Results at the 4- stimuli condition after 0.017 mg/kg scopolamine were not analyzed because only 3/8 subjects responded.

<https://doi.org/10.1371/journal.pone.0187609.g002>

### Pharmacokinetic studies

For all compounds, plasma pharmacokinetic studies were conducted in a separate cohort of cynomolgus monkeys (N = 2–3 subjects per dose) before beginning vsPAL testing to help guide dose selection. Blood samples were obtained with the animals awake and sitting in a primate chair. For most test sessions with BMS-933043 and EVP-6124, plasma samples were also



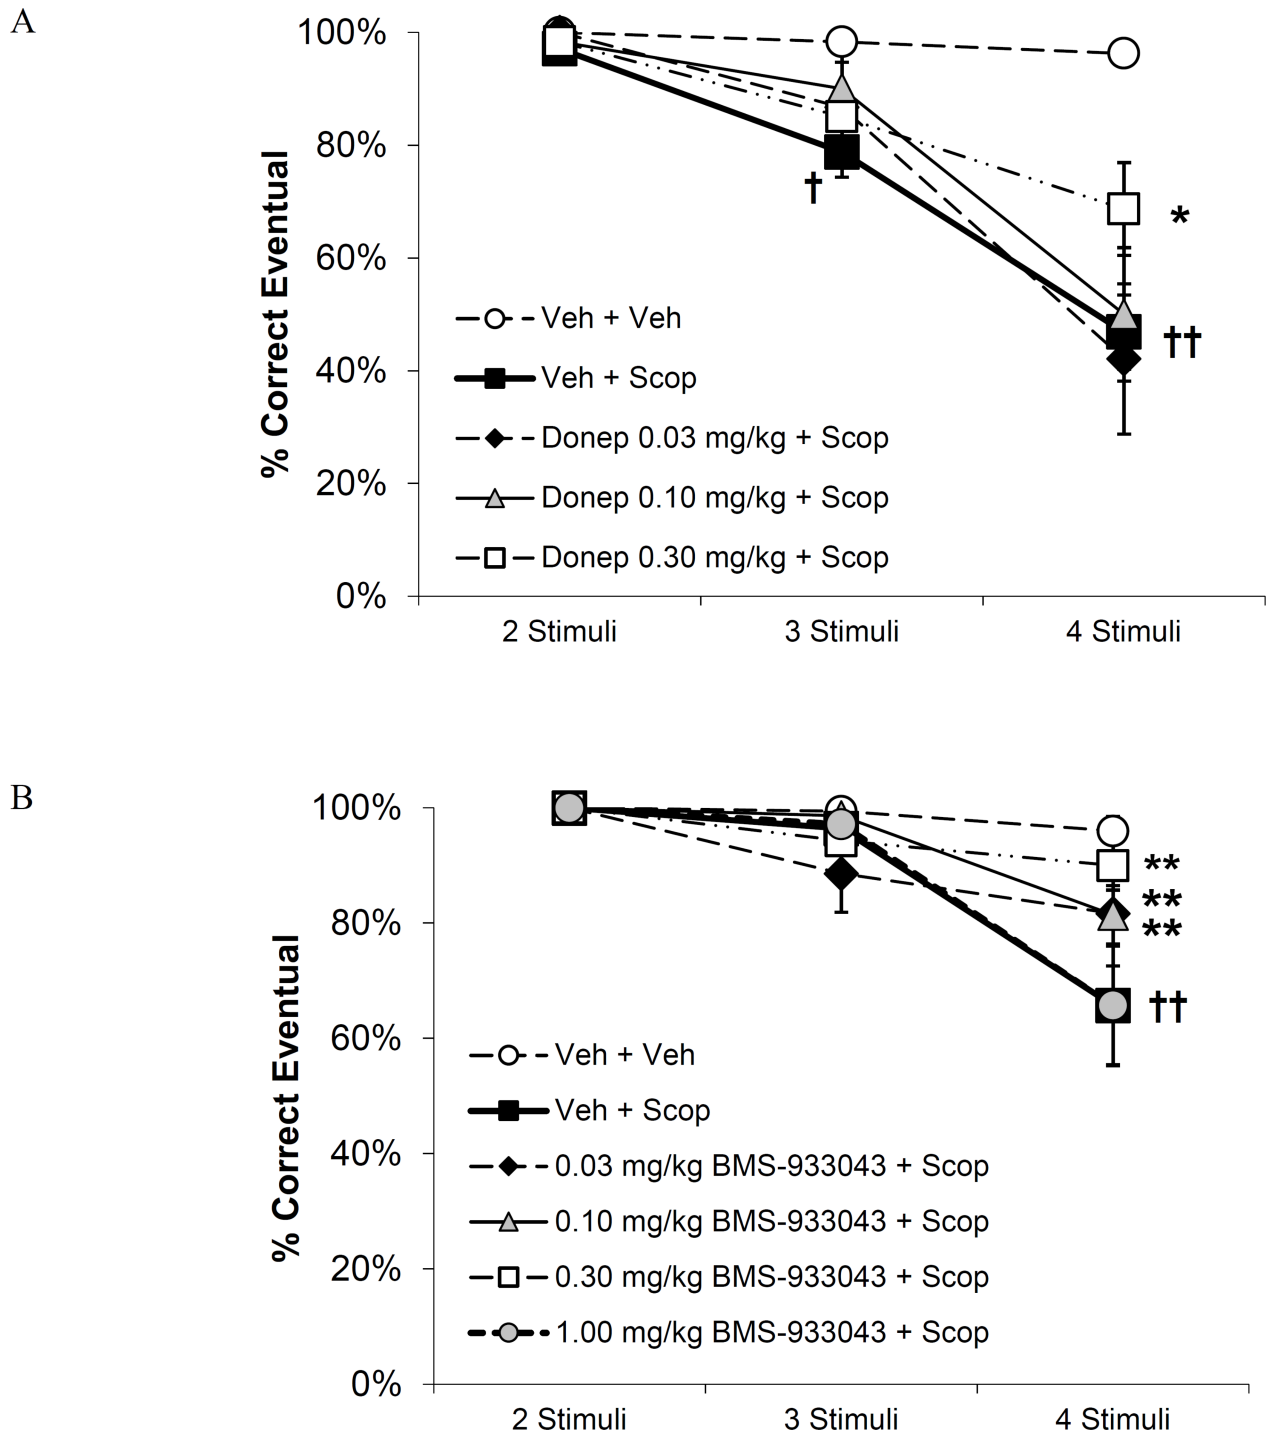

**Fig 3. Effect of treatment with A) donepezil (N = 6) or B) BMS-933043 (N = 7) on scopolamine-induced impairment of learning in the vsPAL task.** Results are presented as the mean ± SEM % eventual correct responses achieved within 6 attempts after presentation of trials with 2-, 3- or 4- stimuli. Results were analyzed by 2 way RM ANOVA followed by Holm-Sidak's post-hoc analysis; †  $p < 0.05$  and ††  $p < 0.01$  compared to vehicle/vehicle treatment; \*  $p < 0.05$  and \*\*  $p < 0.01$  compared to vehicle+scopolamine treatment.

<https://doi.org/10.1371/journal.pone.0187609.g003>

taken from a subset of vsPAL subjects (N = 4–5) immediately after completion of testing (mean (SD) sample collection time = 69.8 (9.8) min post injection).

A

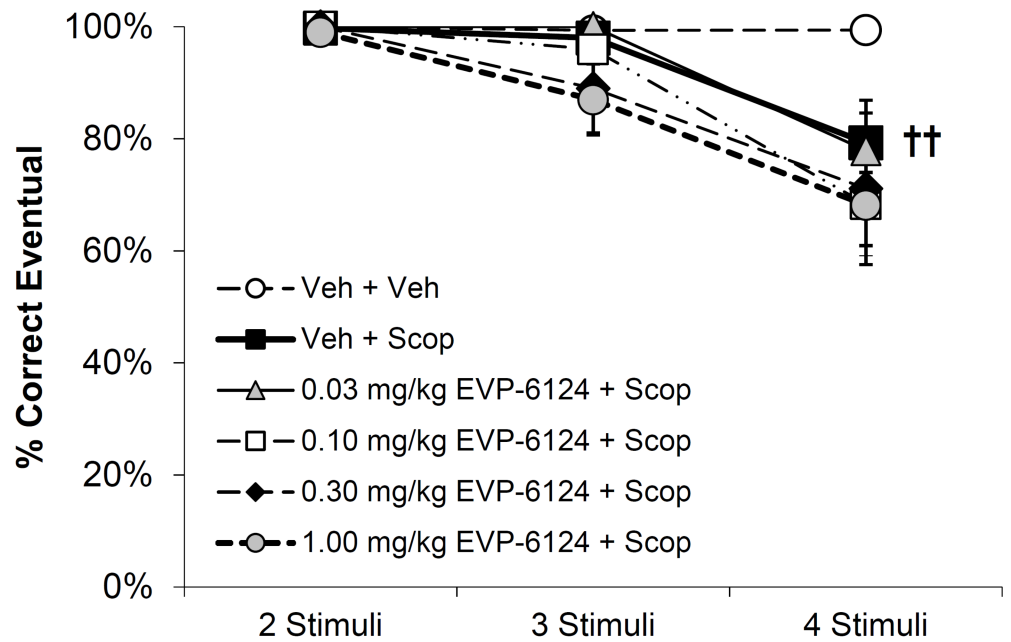

B

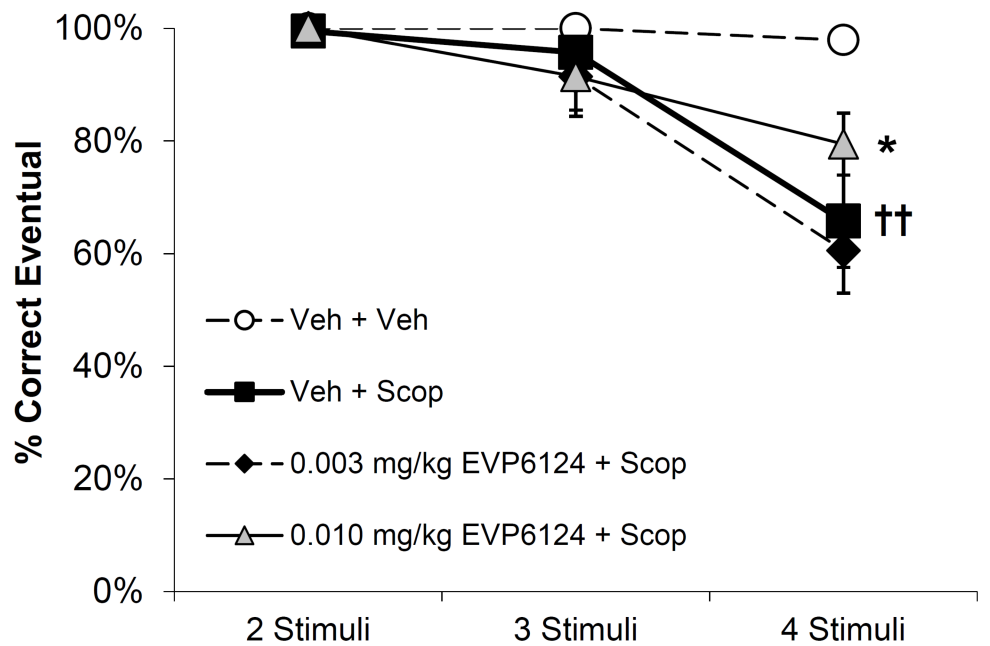

**Fig 4. Effect of treatment with EVP-6124 at A) 0.03–1.0 mg/kg (N = 10) or B) 0.003–0.01 mg/kg (N = 7) on scopolamine-induced impairment of learning in the vsPAL task.** Results are presented as the mean  $\pm$  SEM % eventual correct responses achieved within 6 attempts after presentation of trials with 2-, 3- or 4- stimuli. Results were analyzed by 2 way RM ANOVA followed by Holm-Sidak's post-hoc analysis;  $\dagger\dagger$   $p < 0.01$  compared to vehicle/vehicle treatment; \*  $p < 0.05$  compared to vehicle+scopolamine treatment.

<https://doi.org/10.1371/journal.pone.0187609.g004>



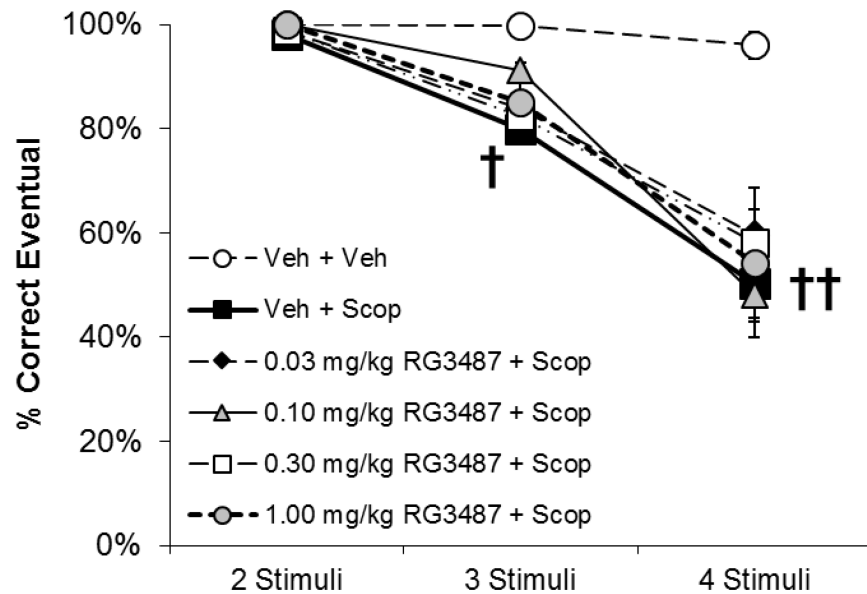

**Fig 5. Effect of treatment with RG3487 on scopolamine-induced impairment of learning in the vsPAL task (N = 8).** Results are presented as the mean  $\pm$  SEM % eventual correct responses achieved within 6 attempts after presentation of trials with 2-, 3- or 4- stimuli. Results were analyzed by 2 way RM ANOVA followed by Holm-Sidak's post-hoc analysis; †  $p < 0.05$  and ††  $p < 0.01$  compared to vehicle/vehicle treatment.

<https://doi.org/10.1371/journal.pone.0187609.g005>

## Plasma concentration analysis

Plasma concentrations of test compounds were determined using LC-MS/MS assays. In brief, 50  $\mu$ L plasma and sample containing compounds was extracted by protein precipitation method with 150  $\mu$ L acetonitrile containing an internal standard. A 5  $\mu$ L sample of supernatant was injected into the LC-MS/MS system. Analytes were separated by reversed phase chromatography and detection of each analyte was achieved through selected reaction monitoring mode of mass spectrometry. Samples were quantified by calculated peak area ratio of analyte and internal standard against a calibration curve.

## Results

### Scopolamine effects on vsPAL performance

Cynomolgus monkeys trained to perform the vsPAL task showed the expected difficulty-dependent reduction in initial attempt accuracy under vehicle treatment conditions (Fig 2A). Repeated attempts of these trials improved eventual accuracy to asymptotic levels (Fig 2B). Scopolamine treatment produced a dose-dependent impairment in vsPAL performance as shown by a reduction in both initial accuracy (Fig 2A) and eventual accuracy (Fig 2B). RM ANOVA confirmed the impairment of initial accuracy with significant main effects of task difficulty ( $F_{3,21} = 198.8$ ;  $p < 0.001$ ), treatment ( $F_{4,28} = 16.4$ ;  $p < 0.001$ ) and their interaction ( $F_{12,84} = 2.8$ ;  $p = 0.003$ ). Post-hoc analyses showed significant reductions in initial accuracy for the 3- stimuli conditions following treatment with scopolamine at doses of 0.0056, 0.01 and 0.017 mg/kg ( $p < 0.05$ ,  $p < 0.01$  and  $p < 0.01$  respectively; Fig 2A). Similarly, 0.0056 and 0.01 mg/kg scopolamine impaired performance of the 4- stimuli condition at the  $p < 0.01$  level. In contrast, performance accuracy at the least difficult, 2- stimuli condition was not significantly impaired at any dose of scopolamine tested (Fig 2A). RM ANOVA also confirmed the impairment of eventual accuracy with significant main effects of task difficulty ( $F_{3,21} = 139.6$ ;

$p < 0.001$ ), treatment ( $F_{4,28} = 31.3$ ;  $p < 0.001$ ) and their interaction ( $F_{12,84} = 11.1$ ;  $p < 0.001$ ). Further post-hoc analysis showed significant reductions in eventual accuracy for both the 3- and 4-stimuli conditions ( $p < 0.01$  for 0.0056 and 0.01 mg/kg; Fig 2B). Eventual accuracy at the 2-stimuli condition was not significantly impaired by any dose of scopolamine tested (Fig 2B).

Latency to respond in the choice phase was not significantly affected by scopolamine treatment ( $F_{4,28} = 0.72$ ;  $p > 0.05$ ; S1 Table). In contrast, a significant reduction in the percent of task completed was observed in subjects treated with scopolamine at doses above 0.003 mg/kg ( $F_{4,28} = 11.0$ ;  $p < 0.001$ ; S1 Table). This pattern was consistent throughout this series of studies, and scopolamine impaired percent task completion consistently, while affecting latency to respond only once (vehicle+scopolamine differed from vehicle/vehicle in the second EVP-6124 study). Interestingly, treatment with donepezil or any of the three nAChR  $\alpha$ 7 agonists did not alter the scopolamine-induced reduction in percent task completed (S1 and S2 Tables). S2 Table presents RM ANOVA details for response latency and percent of task completion for all compounds tested.

### Treatment effects on initial accuracy

Scopolamine impaired performance on the initial correct measure in each study. However, none of the treatments significantly reversed the scopolamine impairment on initial attempt accuracy (S3 and S4 Tables). In contrast, the highest doses of EVP-6124 exacerbated the scopolamine-induced impairment in initial accuracy. RM ANOVA of initial accuracy confirmed significant main effects of task difficulty ( $F_{3,27} = 199.4$ ;  $p < 0.001$ ), treatment ( $F_{5,45} = 14.0$ ;  $p < 0.001$ ) and their interaction ( $F_{15,135} = 5.9$ ;  $p < 0.001$ ). Post-hoc analysis confirmed that vehicle+scopolamine treatment impaired initial accuracy compared to vehicle/vehicle treatment at both the 3- and 4-stimuli conditions (S4 Table). Additionally, impairment of initial accuracy in the 3-stimuli condition following EVP-6124+scopolamine was significantly greater than that of vehicle+scopolamine following 0.3 and 1.0 mg/kg EVP-6124. Trends towards further impairment in the 4-stimulus condition did not reach significance (S3 and S4 Tables).

### Treatment effects on eventual accuracy

Donepezil significantly reduced the impairment of eventual accuracy produced by scopolamine at the most difficult, 4-stimuli task condition (Fig 3). Two-way RM ANOVA confirmed significant main effects of task difficulty ( $F_{3,15} = 44.9$ ;  $p < 0.001$ ), treatment ( $F_{4,20} = 4.9$ ;  $p = 0.006$ ) and their interaction ( $F_{12,60} = 6.4$ ;  $p < 0.001$ ; Fig 3A). Post-hoc analysis confirmed that treatment with vehicle+scopolamine impaired eventual accuracy compared to vehicle/vehicle treatment in the 4-stimuli condition (Fig 3A). The impairment seen after scopolamine treatment on the 4-stimuli condition was significantly reversed by donepezil at the 0.3 mg/kg dose (Fig 3A) with a Cohen's  $d$  of 1.2 consistent with a large effect size. Mean plasma concentrations of donepezil, determined in satellite animals, increased in relation to dose. The average plasma concentration at the 0.3 mg/kg dose was 90.3 nM determined 60 min post-administration (i.e. a time point coinciding with the completion of behavioral testing) (S5 Table).

BMS-933043 significantly reduced the impairment of eventual accuracy produced by scopolamine at the most difficult, 4-stimuli task condition. RM ANOVA of eventual accuracy confirmed significant main effects of difficulty ( $F_{3,18} = 15.1$ ;  $p < 0.001$ ), treatment ( $F_{5,30} = 5.3$ ;  $p = 0.001$ ) and their interaction ( $F_{15,90} = 3.2$ ;  $p < 0.001$ ; Fig 3B). Post-hoc analysis confirmed that treatment with vehicle+scopolamine impaired eventual accuracy compared to vehicle/vehicle treatment at the 4-stimuli task condition (Fig 3B). This impairment was significantly reversed in subjects treated with BMS-933043 at doses of 0.03, 0.1 and 0.3 mg/kg but not when

treated with the highest dose of 1 mg/kg indicating a U-shaped dose-effect relationship (Fig 3B). The Cohen's *d* values were 0.64, 0.73 and 1.2, indicating medium to large effect sizes following administration of 0.03, 0.1 and 0.3 mg/kg BMS-933043, respectively. Mean plasma concentrations of BMS-933043, determined in experimental subjects on completion of behavioral testing, increased in relation to dose with improved eventual accuracy observed over the range of 13.3 to 139.5 nM (S5 Table).

EVP-6124 treatment was examined in 2 separate studies in order to evaluate an extended dose range (Fig 4). Results from the first study showed that EVP-6124, at doses ranging from 0.03–1.0 mg/kg, failed to improve eventual accuracy and worsened initial accuracy in scopolamine treated subjects (S3 Table). RM ANOVA of eventual accuracy confirmed significant main effects of task difficulty ( $F_{3,27} = 21.6$ ;  $p < 0.001$ ), treatment ( $F_{5,45} = 3.8$ ;  $p = 0.006$ ) and their interaction ( $F_{12,60} = 6.4$ ;  $p < 0.001$ ; Fig 4A). Post hoc analysis confirmed that treatment with vehicle+scopolamine impaired eventual accuracy relative to vehicle/vehicle treatment at the 4- stimuli condition and that EVP-6124 treatment failed to alter this impairment (Fig 4A). The second study examined lower doses of EVP-6124 and showed a significant improvement in eventual accuracy at the 0.01 mg/kg dose. RM ANOVA of eventual accuracy confirmed significant main effects of task difficulty ( $F_{3,18} = 16.5$ ;  $p < 0.001$ ), treatment ( $F_{3,18} = 15.6$ ;  $p < 0.001$ ) and their interaction ( $F_{9,54} = 6.3$ ;  $p < 0.001$ ; Fig 4B). Post-hoc analysis confirmed that treatment with vehicle+scopolamine impaired eventual accuracy compared to vehicle/vehicle treatment at the 4- stimuli condition (Fig 4B) and that this was significantly attenuated after treatment with 0.01 mg/kg EVP-6124 (Fig 4B). The Cohen's *d* after 0.01 mg/kg EVP-6124 was 0.82, consistent with a large effect.

In contrast to the effects seen at higher doses, worsening of initial accuracy was not observed in study 2 (S3 Table). Overall the results from both studies show that EVP-6124 exhibits a steep inverted-U shaped dose-effect relationship with improvements in eventual accuracy detected at a single dose only. Mean plasma concentrations of EVP-6124 determined after the behavioral session, increased in relation to dose with improved eventual accuracy observed at 1.6 nM (S5 Table). Worsening of initial accuracy was associated with plasma concentrations ranging from 53.1 to 170.2 nM (S5 Table).

Treatment with RG3487, at doses ranging from 0.03–1.0 mg/kg, failed to improve eventual accuracy in scopolamine treated subjects (Fig 5). RM ANOVA of eventual accuracy confirmed significant main effects of task difficulty ( $F_{3,21} = 26.0$ ;  $p < 0.001$ ), treatment ( $F_{5,35} = 5.5$ ;  $p < 0.001$ ) and their interaction ( $F_{15,105} = 3.3$ ;  $p < 0.001$ ; Fig 5). Post-hoc analysis confirmed that treatment with vehicle+scopolamine impaired eventual accuracy compared to vehicle/vehicle treatment at the 4- stimuli condition (Fig 5) and that RG3487 treatment did not alter this effect (Fig 5). Mean plasma concentrations of RG3487, determined in satellite animals 60 min post-administration (i.e. a time point corresponding to completion of behavioral testing) ranged from 58.7 to 450.0 nM at the 0.1–1.0 mg/kg dose range (S5 Table).

The effects of donepezil and nAChR  $\alpha$ 7 agonist treatments on the percent correct eventual response within the 4- stimuli condition are presented together in Fig 6 to illustrate the shape of the dose-effect functions. For each study, the results are presented as the difference in the % correct eventual between the vehicle+scopolamine condition and other treatments (i.e., vehicle+vehicle or compound+scopolamine). With EVP-6124, the vehicle+vehicle and the vehicle+scopolamine results were averaged from the two studies to enable presentation of both results on same graph. Fig 6 illustrates the dose ranges across which donepezil, EVP-6124 and BMS-933043 attenuated scopolamine's effects (hatched bars, based on their respective RM ANOVAs reported above). Fig 6 also illustrates the study to study variability in the scopolamine impairment, (e.g. the difference between vehicle+vehicle and vehicle+scopolamine for each study) which ranged from 49.4% in the donepezil study and 20.5% in the first EVP-6124 study.

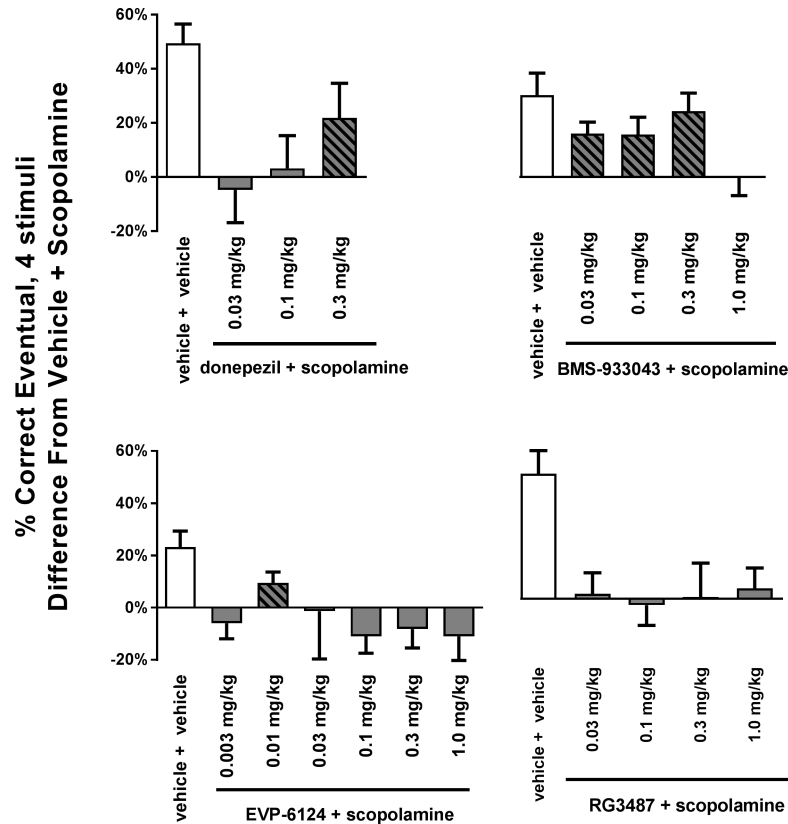

**Fig 6. Comparison of the dose-effect curves to reverse scopolamine-induced impairment of learning in the vsPAL task (% correct eventual).** For each subject, treatment effects on the % correct eventual response were expressed as a difference from the vehicle+scopolamine condition, and group means and SEMs were replotted for side-by-side comparisons. Y axis is percent change from vehicle+scopolamine condition. X axis indicates test condition. Hatched bars indicate a test combination differed significantly from vehicle+scopolamine in post-hoc tests from RM ANOVA dose-response functions (e.g. at  $p < 0.05$  or  $p < 0.01$ ).

<https://doi.org/10.1371/journal.pone.0187609.g006>

### Treatment effects on task completion and latency to respond

Consistent with results from the scopolamine dose-response function, small but statistically significant reductions in percent task completion were observed after individually-titrated scopolamine doses. None of the treatments significantly altered the effect of scopolamine on this measure (S1 and S2 Tables). Latency to respond in the choice phase was typically unaffected by vehicle+scopolamine treatment or drug+scopolamine treatment (S1 and S2 Tables). While a significant increase in vehicle+scopolamine response latency was seen in the second study with EVP-6124 this was not different from latencies seen in EVP-6124+scopolamine conditions consistent with a lack of effect of nAChR  $\alpha$ 7 agonist treatment on latency to respond (S1 and S2 Tables).

### Discussion

The present study shows that treatment with the acetylcholinesterase inhibitor, donepezil or the nAChR  $\alpha$ 7 agonists, BMS-933043 or EVP-6124, improved performance of the CANTAB vsPAL task in scopolamine-treated cynomolgus monkeys. Consistent with previous studies, treatment with scopolamine produced a difficulty-dependent impairment of accuracy on both the initial attempt and the eventual correct response, measures that reflect the formation of a

stimulus-location association and incremental strengthening of the association, i.e. learning, respectively [38, 39]. Treatment with donepezil, BMS-933043 or EVP-6124 selectively improved the eventual correct response indicating a specific effect on the learning component of the vsPAL task. Furthermore, this effect was observed in the absence of changes in measures of psychomotor speed or motivation to work suggesting a true pro-cognitive effect. To our knowledge this is the first report demonstrating that treatment with nAChR  $\alpha$ 7 agonists can improve learning in a scopolamine-induced deficit model in nonhuman primates.

While BMS-933043 and EVP-6124 significantly improved vsPAL learning in scopolamine-treated subjects, neither agent affected the accuracy of the first attempt (initial accuracy). This was somewhat unexpected, as both compounds have been shown to improve recognition memory in rodents [13–15]. However, the first attempt of vsPAL is not a recognition task *per se* as it requires recall for an association between a stimulus and a location, rather than recognition of a previously seen stimulus. Instead the nAChR  $\alpha$ 7 agonists reversed scopolamine's effect on 'eventual correct', improving performance on the learning component of the vsPAL model.

Both BMS-933043 and EVP-6124 showed inverted-U shaped dose-effect curves with improvement at lower doses and a loss of efficacy observed at higher doses. This was particularly striking for EVP-6124 where efficacy was observed at a single dose only, while BMS-933043 retained efficacy across at least a 10 fold dose/exposure range. The potential for steep inverted-U shaped dose-response curves is well recognized for this mechanism and is thought to reflect receptor desensitization. However, the effects of receptor desensitization on the shape of the dose-response curve are not well understood as studies have reported that multiple nAChR  $\alpha$ 7 agonists, including EVP-6124, retain efficacy after repeated dosing in clinical and preclinical models [15, 26, 49–51]. Unfortunately, chronic dosing was beyond the scope of the present study.

Inverted-U shaped dose-response functions present significant challenges for clinical development when testing of a broad dose range in patients may be unrealistic [52]. The inverted-U shape was also seen with nAChR  $\alpha$ 7 agonists in NMDA receptor antagonist-induced deficit assays used to model the cognitive and sensory processing impairment seen in schizophrenia patients. Thus while BMS-933043 improved both S(+)-ketamine-induced N40 gating deficits and MK-801-induced set shifting deficits in rats, efficacy was lost at higher doses in both assays [13]. The efficacious plasma BMS-933043 concentrations ranged from 50–1,860 nM and 146–1,360 nM in the two rat models respectively [13]. In the nonhuman primate scopolamine vsPAL model, efficacy was observed at plasma BMS-933043 exposures ranging from 13–139.5 nM, but lost at plasma concentrations of 493 nM, indicating that the exposure-effect curve is similar to but slightly left-shifted compared with rodent models. In the case of EVP-6124, previous studies in rats have also shown inverted-U shaped dose-effect curves in the novel object recognition (NOR) model, both with respect to improvement in 24 hour recognition memory and reversal of scopolamine-induced impairment [22, 53]. In the rodent NOR studies efficacy was retained over a 10 fold dose range whereas in the nonhuman primate scopolamine vsPAL model EVP-6124 was effective at a single dose only. However, at the maximally effective dose in rats, plasma EVP-6124 concentrations (1–2 nM) were similar to those achieved at the efficacious dose in the present study (1.6 nM). Thus, in scopolamine deficit models, the inverted-U shaped dose-effect relationship for EVP-6124 is much steeper in nonhuman primates compared to rodents but appears to be centered around similar optimal plasma concentrations.

EVP-6124 was chosen for these studies as it has also progressed to clinical testing enabling comparison of preclinical results to effects seen in humans. In healthy volunteers, single oral doses ranging from 1–180 mg showed linear pharmacokinetics with  $C_{max}$  values ranging from 0.6–100 ng/ml (1.8–312 nM) achieved 5–8 hours after dosing [54]. Subjects were also tested

for performance of the Digital Symbol Substitution Test (DSST), a neuropsychological test that examines attention, psychomotor speed and speed of processing [55]. Acute administration of EVP-6124 improved DSST performance and also showed an inverted-U shaped dose-response with maximal effects observed at the 20 mg dose corresponding to a plasma C<sub>max</sub> of 10.4 ng/ml (32 nM) [54]. In contrast, results from a Phase II study in schizophrenia patients suggest that improvements in cognition, as reflected by composite performance scores across several tests in the CogState battery or MATRICS Consensus Cognitive Battery (MCCB), can be achieved at low doses (0.27 and 0.9 mg) producing steady state trough plasma concentrations of 1.6–5.5 nM [56]. Thus the effective dose range of EVP-6124 appears to differ in healthy humans and schizophrenia patients. Interestingly, efficacious exposures from preclinical studies, including the present study (1.6 nM) align most closely with schizophrenia patient exposures for EVP-6124 (1.6–5.5 nM) [56].

In contrast to BMS-933043 and EVP-6124, no reversal of scopolamine-induced impairment of vsPAL performance was observed in subjects treated with the nAChR  $\alpha$ 7 agonist RG3487. These results were unexpected given preclinical studies showing that RG3487 improved object recognition memory retention in naive rats, spatial learning in aged rats and attentional set shifting in chronic PCP-treated rats [15]. While a variety of dosing routes were used across these studies, maximal plasma exposures in separate pharmacokinetic studies ranged from 24–591 ng/ml (89–2,186 nM) at oral doses (1–10 mg/kg) reported to be efficacious in the rat NOR model [15]. RG3487 was also effective in nonhuman primate cognition models however these results have been reported in conference abstracts only and have not been fully published. Nevertheless in unimpaired subjects, improved performance of the object retrieval (response inhibition) and delayed match to sample (DMTS; working memory) tasks was reported with inverted-U shaped dose-effect curves seen in both cases [57]. The efficacious plasma RG3487 concentration range, at the minimally effective dose for pro-cognitive effects across species/models, was cited as 50–200 nM [58]. In addition intramuscular injection of 0.3 mg/kg RG3487 was reported to improve working memory in aged Rhesus monkeys performing the DMTS task [59]. In the present study we tested RG3487 across the 0.03–1 mg/kg im dose range and achieved exposures (predicted and measured) ranging from ~ 15–450 nM, which overlap with doses/exposures reported in other preclinical studies. In addition, despite variability in the scopolamine-induced impairment in vsPAL performance, the magnitude of scopolamine impairment was similar in the RG3487 and donepezil studies, where a significant reversal by donepezil was observed. Nevertheless, given the slightly more modest scopolamine deficit seen in studies testing EVP-6124 and BMS-933043, further investigation may be warranted to confirm the lack of activity of RG3487 in this model. Understanding compound levels in the brain, and receptor occupancy may also enlighten this issue, but these measures were beyond the scope of the present study.

A limitation of these studies was that the scope of the project did not allow for repeated dosing of each agonist dose (only a single determination), and did not allow for testing of the compounds on their own (e.g. without scopolamine); therefore, the effect of nAChR  $\alpha$ 7 agonists on vsPAL performance *per se* is unclear. However, notwithstanding the limitations discussed above, the different nAChR  $\alpha$ 7 agonist treatment effects observed in the scopolamine vsPAL model do not appear to be easily explained by differences in *in vitro* pharmacology. Thus all compounds show potent binding affinity to rat and/or human nAChR  $\alpha$ 7 with K<sub>i</sub> values in the 1–10 nM range depending on the specific radioligand used [13, 15, 22]. With respect to intrinsic efficacy, all agents show a partial agonist profile *in vitro* although the degree of agonism may differ depending on the measure, the experimental system and the potential for receptor desensitization on successive applications of the test agent. Direct comparison of BMS-933043 and EVP-6124, using voltage clamp electrophysiology on HEK293 cells expressing human



nAChR  $\alpha$ 7, showed that EVP-6124 has higher intrinsic activity using both the peak current response (32% versus 24%) and net charge (136% versus 78%) to define the response relative to acetylcholine [13]. EVP-6124 may also have higher intrinsic activity compared to RG3487; in xenopus oocytes expressing human nAChR  $\alpha$ 7 the maximal peak current elicited by EVP-6124 was 80% of the acetylcholine response as compared to 63% reported for RG3487 [15, 22]. Thus the steep inverted-U shaped dose-effect curve seen for EVP-6124 may in part reflect the higher intrinsic efficacy of this agent. It is also interesting that we observed a worsening of initial accuracy at higher doses of EVP-6124 that was not seen at any dose of BMS-933043 or RG3487. RG3487 has also been tested in QM7 cells expressing human nAChR  $\alpha$ 7; the maximal peak current and net charge was 69% and 53% respectively relative to acetylcholine [15]. The degree of partial agonism is therefore higher or lower than BMS-933043 depending on the measure suggesting this is unlikely to explain the difference between these 2 agents. Finally, it should be noted that RG3487 and EVP-6124 are also potent 5-HT<sub>3</sub> receptor antagonists [15, 22] and that treatment with 5-HT<sub>3</sub> antagonists is reported to improve recognition memory in macaques [60]. Recent studies with tropisetron, a non-selective nAChR  $\alpha$ 7 agonist and 5-HT<sub>3</sub> receptor antagonist, also show improved working memory in aged macaques performing the DMTS task [11]. While this additional pharmacological activity may complicate interpretation of the effects seen *in vivo*, studies in rodents have confirmed that the pro-cognitive effects of RG3487 and EVP-6124 are blocked by the selective nAChR  $\alpha$ 7 antagonist methyllycaconitine [15, 22]. In a similar manner, *in vitro* and *in vivo* results support the role of nAChR  $\alpha$ 7 in mediating the pro-cognitive effects of tropisetron [11, 61]. Importantly, BMS-933043 is highly selective for nAChR  $\alpha$ 7 versus the 5-HT<sub>3</sub> receptor confirming that nAChR  $\alpha$ 7 agonism is sufficient to produce pro-cognitive effects [13]. Thus additional pharmacology at the 5-HT<sub>3</sub> receptor seems unlikely to account for the different profiles observed for these agents in the scopolamine vsPAL model.

An important consideration for the present study was the selection of the vsPAL procedure as a model suitable for translation from nonhuman primates to humans. In this regard, recent studies in healthy humans have shown that scopolamine produces a robust reduction in vsPAL performance accuracy that was significantly improved by co-treatment with the acetylcholinesterase inhibitor donepezil [40]. An important note is that similar to the results of the current study in monkeys, donepezil only partially reversed scopolamine's impairment in the learning component of vsPAL in humans [40]. The results seen in the present study are therefore consistent with those reported in humans performing this task. Other cholinergic agents reported to be efficacious in the scopolamine vsPAL model in nonhuman primates include the M1 receptor selective positive allosteric modulator PQCA (1-((4-cyano-4-(pyridine-2-yl)piperidin-1-yl)methyl-4-oxo-4 H-quinolizine-3-carboxylic acid) [39] and the nAChR  $\alpha$ 7 agonists tested in the present study, EVP-6124 and BMS-933043. Unfortunately human data for either M1 modulators or nAChR  $\alpha$ 7 agonists in the scopolamine vsPAL task are not currently available and the utility of the model as a translational approach remains to be determined. This is particularly relevant for the nAChR  $\alpha$ 7 mechanism which, thus far, has proven disappointing in the clinic despite the extensive body of preclinical literature supporting the approach. This disconnect was recently explored by meta-analyses to compare the effect size for cognitive improvement in rodents with results from patients [52]. The analyses included several different nAChR  $\alpha$ 7 agonists and showed that collectively, these agents produced large effect sizes in rodent cognition models such as the NOR and Morris water maze test. Large treatment effect sizes (i.e. Cohen's D values >8) were also seen at maximally efficacious doses of EVP-6124 and BMS-933043 in the present study indicating that the magnitude of the pro-cognitive effect is consistent across rodents and nonhuman primates. In contrast, evaluation of results from patients showed that nAChR  $\alpha$ 7 agonist treatment effect sizes were small and of



uncertain clinical significance [52]. It should be noted, however, that the majority of the results included in the analyses were from schizophrenia patients; only 3 out of 18 studies were conducted in AD patients with 2 reporting only composite cognition scores. Results for EVP-6124 in AD patients could not be included because of insufficient data disclosure; this agent completed Phase II studies but was discontinued in Phase III due to serious gastrointestinal side effects [49, 50]. Interestingly, the incorporation of human paradigms, with increased face validity to animal paradigms, was proposed as a strategy to improve the clinical translation for nAChR  $\alpha$ 7 agonists. In this regard, the scopolamine vsPAL model may serve as a suitable bridging model to the support the further development of novel agents like BMS-933043.

In conclusion, treatment with donepezil significantly improved learning of stimulus/location pairs in scopolamine-treated nonhuman primates performing the vsPAL task, effects similar to those reported in healthy humans. Treatment with the nAChR  $\alpha$ 7 agonist, BMS-933043, was also effective and exhibited a broader dose-effect relationship compared to EVP-6124. The results suggest that the scopolamine vsPAL model may have utility as a translational approach to support the transition of novel therapeutics into early clinical development.

## Supporting information

**S1 Fig. Schematic of vsPAL procedure.** Example of the most difficult trial; 4 stimuli (abstract shapes) in 4 locations. In the sample phase (top row) each shape is presented individually and the monkey has to touch the shape in its 'correct' location to receive a food reward. After a 5 s delay, the choice phase begins in which each shape is presented in all locations. Touching the shape in the correct location results in a food pellet and the next shape is presented. Touching the shape in an incorrect location ends that attempt and initiates a 10 s time out. Another attempt at the same trial begins with the sample phase, and stimuli are presented in the same order. Monkeys are allowed up to 5 repeated attempts (i.e. 6 total attempts) before a new trial with new stimuli are presented.

(TIF)

**S1 Table. Response latencies in choice phase and percent task completed measures.** † and †† indicate differences from vehicle condition (at  $p < 0.05$  and  $p < 0.01$  respectively). In the scopolamine dose-response study, scopolamine differed from vehicle. In the drug combination studies, vehicle+scopolamine differed significantly from vehicle+vehicle.

(DOCX)

**S2 Table. RM ANOVA details for choice response latency and percent task completed.**

n.s. = not significant ( $p > 0.05$ ).

(DOCX)

**S3 Table. Effects of treatments on initial correct measure.** † and †† indicate vehicle+scopolamine differed significantly from vehicle+vehicle (at  $p < 0.05$  and  $p < 0.01$  respectively) after a significant RM-ANOVA. \* and \*\* indicate EVP6124+scopolamine differed from vehicle+scopolamine ( $p < 0.05$  and  $p < 0.05$ , respectively) after a significant RM-ANOVA (ANOVA details are in S4 Table). EVP-6124 exacerbated the scopolamine-induced impairment in initial attempt accuracy.

(DOCX)

**S4 Table. RM ANOVA details for percent correct on initial attempt.** n.s. = not significant ( $p > 0.05$ ).

(DOCX)

**S5 Table. Plasma drug levels after i.m. administration in cynomolgus monkeys.** n.d. = not determined.

(DOCX)

**S1 File. Supplemental data file.** S1 File includes all applicable data for this manuscript.

(XLSX)

## Acknowledgments

We would like to acknowledge the expert assistance of Ivar McDonald and Matthew Hill in the synthesis of compounds for these studies. Figure of donepezil structure obtained from <http://www.chemspider.com/Chemical-Structure.3040.html>

## Author Contributions

**Conceptualization:** Michael R. Weed, John E. Macor, Robert Zaczek, Richard Olson, Linda J. Bristow.

**Data curation:** Michael R. Weed, Joseph Polino, Laura Signor, Mark Bookbinder, Yulia Benitex, Daniel G. Morgan.

**Formal analysis:** Michael R. Weed.

**Investigation:** Michael R. Weed, Joseph Polino, Laura Signor, Mark Bookbinder, Deborah Keavy, Yulia Benitex, Daniel G. Morgan, Dalton King.

**Methodology:** Michael R. Weed, Joseph Polino, Laura Signor.

**Project administration:** Michael R. Weed, Joseph Polino.

**Resources:** Michael R. Weed, Daniel G. Morgan, Dalton King, John E. Macor, Robert Zaczek, Richard Olson, Linda J. Bristow.

**Supervision:** Michael R. Weed, Joseph Polino, Daniel G. Morgan, John E. Macor, Robert Zaczek, Richard Olson, Linda J. Bristow.

**Validation:** Joseph Polino.

**Writing – original draft:** Michael R. Weed, Joseph Polino.

**Writing – review & editing:** Michael R. Weed, Joseph Polino, Dalton King, Linda J. Bristow.

## References

1. Beinat C, Banister SD, Herrera M, Law V, Kassiou M. The Therapeutic Potential of alpha7 Nicotinic Acetylcholine Receptor (alpha7 nAChR) Agonists for the Treatment of the Cognitive Deficits Associated with Schizophrenia. *CNS drugs*. 2015; 29(7):529–42. <https://doi.org/10.1007/s40263-015-0260-0> PMID: 26242477.
2. Thomsen MS, Hansen HH, Timmerman DB, Mikkelsen JD. Cognitive improvement by activation of alpha7 nicotinic acetylcholine receptors: from animal models to human pathophysiology. *Current pharmaceutical design*. 2010; 16(3):323–43. PMID: 20109142.
3. Rezvani AH, Kholdebarin E, Brucato FH, Callahan PM, Lowe DA, Levin ED. Effect of R3487/MEM3454, a novel nicotinic alpha7 receptor partial agonist and 5-HT3 antagonist on sustained attention in rats. *Progress in neuro-psychopharmacology & biological psychiatry*. 2009; 33(2):269–75. <https://doi.org/10.1016/j.pnpbp.2008.11.018> PMID: 19110025.
4. Hayward A, Adamson L, Neill JC. Partial agonism at the alpha7 nicotinic acetylcholine receptor improves attention, impulsive action and vigilance in low attentive rats. *Eur Neuropsychopharmacol*. 2017. <https://doi.org/10.1016/j.euroneuro.2017.01.013> PMID: 28161246.
5. Hauser TA, Kucinski A, Jordan KG, Gatto GJ, Wersinger SR, Hesse RA, et al. TC-5619: an alpha7 neuronal nicotinic receptor-selective agonist that demonstrates efficacy in animal models of the positive

- and negative symptoms and cognitive dysfunction of schizophrenia. *Biochemical pharmacology*. 2009; 78(7):803–12. <https://doi.org/10.1016/j.bcp.2009.05.030> PMID: 19482012; PubMed Central PMCID: PMC3005247.
6. Pichat P, Bergis OE, Terranova JP, Urani A, Duarte C, Santucci V, et al. SSR180711, a novel selective alpha7 nicotinic receptor partial agonist: (II) efficacy in experimental models predictive of activity against cognitive symptoms of schizophrenia. *Neuropsychopharmacology: official publication of the American College of Neuropsychopharmacology*. 2007; 32(1):17–34. <https://doi.org/10.1038/sj.npp.1301188> PMID: 16936709.
  7. Roncarati R, Scali C, Comery TA, Grauer SM, Aschmi S, Bothmann H, et al. Procognitive and neuroprotective activity of a novel alpha7 nicotinic acetylcholine receptor agonist for treatment of neurodegenerative and cognitive disorders. *The Journal of pharmacology and experimental therapeutics*. 2009; 329(2):459–68. <https://doi.org/10.1124/jpet.108.150094> PMID: 19223665.
  8. Sydserff S, Sutton EJ, Song D, Quirk MC, Maciag C, Li C, et al. Selective alpha7 nicotinic receptor activation by AZD0328 enhances cortical dopamine release and improves learning and attentional processes. *Biochemical pharmacology*. 2009; 78(7):880–8. <https://doi.org/10.1016/j.bcp.2009.07.005> PMID: 19615981.
  9. Briggs CA, Anderson DJ, Brioni JD, Buccafusco JJ, Buckley MJ, Campbell JE, et al. Functional characterization of the novel neuronal nicotinic acetylcholine receptor ligand GTS-21 in vitro and in vivo. *Pharmacology, biochemistry, and behavior*. 1997; 57(1–2):231–41. PMID: 9164577.
  10. Buccafusco JJ, Terry AV Jr., Decker MW, Gopalakrishnan M. Profile of nicotinic acetylcholine receptor agonists ABT-594 and A-582941, with differential subtype selectivity, on delayed matching accuracy by young monkeys. *Biochemical pharmacology*. 2007; 74(8):1202–11. <https://doi.org/10.1016/j.bcp.2007.07.010> PMID: 17706609.
  11. Callahan PM, Bertrand D, Bertrand S, Plagenhoef MR, Terry AV Jr. Tropicisetron sensitizes alpha7 containing nicotinic receptors to low levels of acetylcholine in vitro and improves memory-related task performance in young and aged animals. *Neuropharmacology*. 2017. <https://doi.org/10.1016/j.neuropharm.2017.02.025> PMID: 28259598.
  12. Castner SA, Smagin GN, Piser TM, Wang Y, Smith JS, Christian EP, et al. Immediate and sustained improvements in working memory after selective stimulation of alpha7 nicotinic acetylcholine receptors. *Biological psychiatry*. 2011; 69(1):12–8. <https://doi.org/10.1016/j.biopsych.2010.08.006> PMID: 20965497.
  13. Bristow LJ, Easton A, Li YW, Sivarao DV, Lidge R, Jones KM, et al. The Novel Nicotinic Alpha7 Receptor Partial Agonist, BMS-933043, Improves Cognition and Sensory Processing in Preclinical Models of Schizophrenia. *PLoS One*. 2016; 11(7). PubMed Central PMCID: PMC4965148.
  14. Jones KM, McDonald IM, Bourin C, Olson RE, Bristow LJ, Easton A. Effect of alpha7 nicotinic acetylcholine receptor agonists on attentional set-shifting impairment in rats. *Psychopharmacology (Berl)*. 2014; 231(4):673–83. <https://doi.org/10.1007/s00213-013-3275-6> PMID: 24057763.
  15. Wallace TL, Callahan PM, Tehim A, Bertrand D, Tombaugh G, Wang S, et al. RG3487, a novel nicotinic alpha7 receptor partial agonist, improves cognition and sensorimotor gating in rodents. *The Journal of pharmacology and experimental therapeutics*. 2011; 336(1):242–53. <https://doi.org/10.1124/jpet.110.171892> PMID: 20959364.
  16. Hashimoto K, Ishima T, Fujita Y, Matsuo M, Kobashi T, Takahagi M, et al. Phencyclidine-induced cognitive deficits in mice are improved by subsequent subchronic administration of the novel selective alpha7 nicotinic receptor agonist SSR180711. *Biological psychiatry*. 2008; 63(1):92–7. <https://doi.org/10.1016/j.biopsych.2007.04.034> PMID: 17601496.
  17. Buccafusco JJ, Terry AV Jr. A reversible model of the cognitive impairment associated with schizophrenia in monkeys: potential therapeutic effects of two nicotinic acetylcholine receptor agonists. *Biochemical pharmacology*. 2009; 78(7):852–62. <https://doi.org/10.1016/j.bcp.2009.06.102> PMID: 19577545; PubMed Central PMCID: PMC2728139.
  18. Javitt DC, Zukin SR. Recent advances in the phencyclidine model of schizophrenia. *Am J Psychiatry*. 1991; 148(10):1301–8. <https://doi.org/10.1176/ajp.148.10.1301> PMID: 1654746.
  19. Krystal JH, Karper LP, Seibyl JP, Freeman GK, Delaney R, Bremner JD, et al. Subanesthetic effects of the noncompetitive NMDA antagonist, ketamine, in humans. Psychotomimetic, perceptual, cognitive, and neuroendocrine responses. *Arch Gen Psychiatry*. 1994; 51(3):199–214. PMID: 8122957.
  20. Buccafusco JJ. The Revival of Scopolamine Reversal for the Assessment of Cognition-Enhancing Drugs. In: Buccafusco JJ, editor. *Methods of Behavior Analysis in Neuroscience*. Frontiers in Neuroscience. 2nd ed. Boca Raton (FL)2009.
  21. Klinkenberg I, Blokland A. The validity of scopolamine as a pharmacological model for cognitive impairment: a review of animal behavioral studies. *Neurosci Biobehav Rev*. 2010; 34(8):1307–50. <https://doi.org/10.1016/j.neubiorev.2010.04.001> PMID: 20398692.

22. Prickaerts J, van Goethem NP, Chesworth R, Shapiro G, Boess FG, Methfessel C, et al. EVP-6124, a novel and selective α7 nicotinic acetylcholine receptor partial agonist, improves memory performance by potentiating the acetylcholine response of α7 nicotinic acetylcholine receptors. *Neuropharmacology*. 2012; 62(2):1099–110. <https://doi.org/10.1016/j.neuropharm.2011.10.024> PMID: 22085888.
23. Bali ZK, Inkeller J, Csurgok R, Bruszt N, Horvath H, Hernadi I. Differential effects of α7 nicotinic receptor agonist PHA-543613 on spatial memory performance of rats in two distinct pharmacological dementia models. *Behav Brain Res*. 2015; 278:404–10. <https://doi.org/10.1016/j.bbr.2014.10.030> PMID: 25447295.
24. Redrobe JP, Nielsen EO, Christensen JK, Peters D, Timmermann DB, Olsen GM. Alpha7 nicotinic acetylcholine receptor activation ameliorates scopolamine-induced behavioural changes in a modified continuous Y-maze task in mice. *European journal of pharmacology*. 2009; 602(1):58–65. <https://doi.org/10.1016/j.ejphar.2008.09.035> PMID: 18848931.
25. Boess FG, de Vry J, Erb C, Flessner T, Hendrix M, Luthle J, et al. Pharmacological and behavioral profile of N-[(3R)-1-azabicyclo[2.2.2]oct-3-yl]-6-cholinocarboxamide (EVP-5141), a novel α7 nicotinic acetylcholine receptor agonist/serotonin 5-HT3 receptor antagonist. *Psychopharmacology (Berl)*. 2013; 227(1):1–17. <https://doi.org/10.1007/s00213-012-2933-4> PMID: 23241647.
26. Medeiros R, Castello NA, Cheng D, Kitazawa M, Baglietto-Vargas D, Green KN, et al. α7 Nicotinic receptor agonist enhances cognition in aged 3xTg-AD mice with robust plaques and tangles. *Am J Pathol*. 2014; 184(2):520–9. <https://doi.org/10.1016/j.ajpath.2013.10.010> PMID: 24269557.
27. Fray PJ, Robbins TW. CANTAB battery: proposed utility in neurotoxicology. *Neurotoxicology and teratology*. 1996; 18(4):499–504. PMID: 8866544.
28. Robbins TW, James M, Owen AM, Sahakian BJ, McInnes L, Rabbitt P. Cambridge Neuropsychological Test Automated Battery (CANTAB): a factor analytic study of a large sample of normal elderly volunteers. *Dementia*. 1994; 5(5):266–81. PMID: 7951684.
29. Spinelli S, Pennanen L, Dettling AC, Feldon J, Higgins GA, Pryce CR. Performance of the marmoset monkey on computerized tasks of attention and working memory. *Brain research Cognitive brain research*. 2004; 19(2):123–37. <https://doi.org/10.1016/j.cogbrainres.2003.11.007> PMID: 15019709.
30. Weed MR, Taffe MA, Polis I, Roberts AC, Robbins TW, Koob GF, et al. Performance norms for a rhesus monkey neuropsychological testing battery: acquisition and long-term performance. *Brain research Cognitive brain research*. 1999; 8(3):185–201. PMID: 10556598.
31. Barnett JH, Robbins TW, Leeson VC, Sahakian BJ, Joyce EM, Blackwell AD. Assessing cognitive function in clinical trials of schizophrenia. *Neurosci Biobehav Rev*. 2010; 34(8):1161–77. <https://doi.org/10.1016/j.neubiorev.2010.01.012> PMID: 20105440.
32. Chamberlain SR, Blackwell AD, Nathan PJ, Hammond G, Robbins TW, Hodges JR, et al. Differential cognitive deterioration in dementia: a two year longitudinal study. *Journal of Alzheimer's disease: JAD*. 2011; 24(1):125–36. <https://doi.org/10.3233/JAD-2010-100450> PMID: 21206003.
33. Egerhazi A, Berecz R, Bartok E, Degrell I. Automated Neuropsychological Test Battery (CANTAB) in mild cognitive impairment and in Alzheimer's disease. *Progress in neuro-psychopharmacology & biological psychiatry*. 2007; 31(3):746–51. <https://doi.org/10.1016/j.pnpbp.2007.01.011> PMID: 17289240.
34. Swainson R, Hodges JR, Galton CJ, Semple J, Michael A, Dunn BD, et al. Early detection and differential diagnosis of Alzheimer's disease and depression with neuropsychological tasks. *Dementia and geriatric cognitive disorders*. 2001; 12(4):265–80. doi: 51269. <https://doi.org/10.1159/000051269> PMID: 11351138.
35. Fowler KS, Saling MM, Conway EL, Semple JM, Louis WJ. Paired associate performance in the early detection of DAT. *Journal of the International Neuropsychological Society: JINS*. 2002; 8(1):58–71. PMID: 11843075.
36. de Rover M, Pironti VA, McCabe JA, Acosta-Cabronero J, Arana FS, Morein-Zamir S, et al. Hippocampal dysfunction in patients with mild cognitive impairment: a functional neuroimaging study of a visuo-spatial paired associates learning task. *Neuropsychologia*. 2011; 49(7):2060–70. <https://doi.org/10.1016/j.neuropsychologia.2011.03.037> PMID: 21477602.
37. Kuzmickiene J, Kaubrys G. Selective Ability of Some CANTAB Battery Test Measures to Detect Cognitive Response to a Single Dose of Donepezil in Alzheimer Disease. *Medical science monitor: international medical journal of experimental and clinical research*. 2015; 21:2572–82. <https://doi.org/10.12659/MSM.895381> PMID: 26336931; PubMed Central PMCID: PMC4562612.
38. Taffe MA, Weed MR, Gutierrez T, Davis SA, Gold LH. Differential muscarinic and NMDA contributions to visuo-spatial paired-associate learning in rhesus monkeys. *Psychopharmacology (Berl)*. 2002; 160(3):253–62. <https://doi.org/10.1007/s00213-001-0954-5> PMID: 11889494.
39. Lange HS, Cannon CE, Drott JT, Kuduk SD, Uslander JM. The M1 Muscarinic Positive Allosteric Modulator PQCA Improves Performance on Translatable Tests of Memory and Attention in Rhesus Monkeys.

- The Journal of pharmacology and experimental therapeutics. 2015; 355(3):442–50. <https://doi.org/10.1124/jpet.115.226712> PMID: 26446308.
40. Harel BT, Pietrzak RH, Snyder PJ, Maruff P. Effect of cholinergic neurotransmission modulation on visual spatial paired associate learning in healthy human adults. *Psychopharmacology (Berl)*. 2013; 228(4):673–83. <https://doi.org/10.1007/s00213-013-3072-2> PMID: 23568575.
  41. Rusted JM, Warburton DM. The effects of scopolamine on working memory in healthy young volunteers. *Psychopharmacology (Berl)*. 1988; 96(2):145–52. PMID: 3148139.
  42. Robbins TW, Semple J, Kumar R, Truman MI, Shorter J, Ferraro A, et al. Effects of scopolamine on delayed-matching-to-sample and paired associates tests of visual memory and learning in human subjects: comparison with diazepam and implications for dementia. *Psychopharmacology (Berl)*. 1997; 134(1):95–106. PMID: 9399372.
  43. King D, Iwuagwu C, Cook J, McDonald IM, Mate R, Zusi FC, et al. BMS-933043, a Selective  $\alpha$ 7 nAChR Partial Agonist for the Treatment of Cognitive Deficits Associated with Schizophrenia. *ACS Med Chem Lett*. 2017; 8(3):366–71. <https://doi.org/10.1021/acsmedchemlett.7b00032> PMID: 28337332; PubMed Central PMCID: PMC5346989.
  44. NRC. Guide for the Care and Use of Laboratory Animals. The National Academies Collection: Reports funded by National Institutes of Health. 8th ed. Washington (DC): National Academies Press (US); 2011.
  45. Cardinal RN, Aitken MR. Whisker: a client-server high-performance multimedia research control system. *Behavior research methods*. 2010; 42(4):1059–71. <https://doi.org/10.3758/BRM.42.4.1059> PMID: 21139173.
  46. Taffe MA, Weed MR, Gutierrez T, Davis SA, Gold LH. Modeling a task that is sensitive to dementia of the Alzheimer's type: individual differences in acquisition of a visuo-spatial paired-associate learning task in rhesus monkeys. *Behav Brain Res*. 2004; 149(2):123–33. PMID: 15129776.
  47. Mazurov AA, Speake JD, Yohannes D. Discovery and development of  $\alpha$ 7 nicotinic acetylcholine receptor modulators. *Journal of medicinal chemistry*. 2011; 54(23):7943–61. <https://doi.org/10.1021/jm2007672> PMID: 21919481.
  48. Cohen J. Stastical Power Analysis. *Current Directions in Psychological Science*. 1992; 1, No. 3:98–101.
  49. Deardorff WJ, Shobassy A, Grossberg GT. Safety and clinical effects of EVP-6124 in subjects with Alzheimer's disease currently or previously receiving an acetylcholinesterase inhibitor medication. *Expert review of neurotherapeutics*. 2015; 15(1):7–17. <https://doi.org/10.1586/14737175.2015.995639> PMID: 25495510.
  50. MT-4666 in Alzheimer's Disease: Discontinuation of Global Phase 3 Clinical Trial Program in Japan [Internet]. Mitsubishi Tanabe Pharma; 2015; September 15; [1]. Available from: [http://www.mt-pharma.co.jp/e/release/nr/2015/pdf/e\\_MTPC150915.pdf](http://www.mt-pharma.co.jp/e/release/nr/2015/pdf/e_MTPC150915.pdf)
  51. Preskorn SH, Gawryl M, Dgetluck N, Palfreyman M, Bauer LO, Hilt DC. Normalizing effects of EVP-6124, an  $\alpha$ -7 nicotinic partial agonist, on event-related potentials and cognition: a proof of concept, randomized trial in patients with schizophrenia. *J Psychiatr Pract*. 2014; 20(1):12–24. <https://doi.org/10.1097/01.pra.0000442935.15833.c5> PMID: 24419307.
  52. Lewis AS, van Schalkwyk GI, Bloch MH.  $\alpha$ -7 nicotinic agonists for cognitive deficits in neuropsychiatric disorders: A translational meta-analysis of rodent and human studies. *Progress in neuro-psychopharmacology & biological psychiatry*. 2017; 75:45–53. <https://doi.org/10.1016/j.pnpbp.2017.01.001> PMID: 28065843.
  53. van Goethem NP, Prickaerts J, Welty D, Flood DG, Koenig G. Continuous infusion of the  $\alpha$ 7 nicotinic acetylcholine receptor agonist EVP-6124 produces no signs of tolerance at memory-enhancing doses in rats: a pharmacokinetic and behavioral study. *Behav Pharmacol*. 2015; 26(4):403–6. <https://doi.org/10.1097/FBP.0000000000000134> PMID: 25794332.
  54. Barbier AJ, Hilhorst M, Van Vliet A, Snyder P, Palfreyman MG, Gawryl M, et al. Pharmacodynamics, pharmacokinetics, safety, and tolerability of encenicline, a selective  $\alpha$ 7 nicotinic receptor partial agonist, in single ascending-dose and bioavailability studies. *Clinical therapeutics*. 2015; 37(2):311–24. <https://doi.org/10.1016/j.clinthera.2014.09.013> PMID: 25438724.
  55. Wechsler D. The measurement of adult intelligence. First ed. Baltimore, MD: Williams & Wilkins; 1939.
  56. Keefe RS, Meltzer HA, Dgetluck N, Gawryl M, Koenig G, Moebius HJ, et al. Randomized, Double-Blind, Placebo-Controlled Study of Encenicline, an  $\alpha$ 7 Nicotinic Acetylcholine Receptor Agonist, as a Treatment for Cognitive Impairment in Schizophrenia. *Neuropsychopharmacology: official publication of the American College of Neuropsychopharmacology*. 2015. <https://doi.org/10.1038/npp.2015.176> PMID: 26089183.

57. Wallace-Boone TL, Chiu G, Dao H, Lowe D, Porter R, Santarelli L. R3487/MEM-3454, a novel nicotinic  $\alpha$ 7 receptor partial agonist, improves attention and working memory performance in cynomolgus macaques. *Society for Neuroscience* 2009.
58. Wallace TL, Chiu G, Dao H, Santarelli L, Porter R, Bertrand D. Modulation of cholinergic tone impacts the efficacy of RG3487 / MEM3454, a novel, nicotinic  $\alpha$  7 receptor agonist. *Society for Neuroscience* 2010.
59. Callahan PM, Rowe WB, Xie W, Terry JV, Buccafusco JJ, Tehim A. MEM 3454, a novel nicotinic  $\alpha$ 7 receptor partial agonist: II. Effects in models predictive of cognitive restoration in Alzheimer's disease. *Society for Neuroscience* 2006.
60. Terry AV Jr., Buccafusco JJ, Prendergast MA, Jackson WJ, Fontana DL, Wong EH, et al. The 5-HT<sub>3</sub> receptor antagonist, RS-56812, enhances delayed matching performance in monkeys. *Neuroreport*. 1996; 8(1):49–54. PMID: [9051751](https://pubmed.ncbi.nlm.nih.gov/9051751/).
61. Hashimoto K, Fujita Y, Ishima T, Hagiwara H, Iyo M. Phencyclidine-induced cognitive deficits in mice are improved by subsequent subchronic administration of tropisetron: role of  $\alpha$ 7 nicotinic receptors. *European journal of pharmacology*. 2006; 553(1–3):191–5. <https://doi.org/10.1016/j.ejphar.2006.09.055> PMID: [17094961](https://pubmed.ncbi.nlm.nih.gov/17094961/).
